# Supplementary material
Source: PubMed Central journal article supplement (PMC5013913)

**Table S1.** Computation time for gene-level tests

| Gene size: 20, sample size: 3000, number of cores = 20, number of replication: 1000 |                    |                                                                                   |          |         |
|-------------------------------------------------------------------------------------|--------------------|-----------------------------------------------------------------------------------|----------|---------|
| QTest <sub>1</sub>                                                                  | QTest <sub>2</sub> | QTest <sub>3</sub><br>(including QTest <sub>1</sub> & QTest <sub>2</sub> results) | SKAT     | SKAT-O  |
| 91.321s                                                                             | 103.139s           | 113.207s                                                                          | 100.102s | 235.41s |

**Table S2.** Top genes associated with liver enzymes in KARE (using rare variants).

| phenotype | Gene name | Chromosome | Gene size | P-value  |          |                    |                    |                    |
|-----------|-----------|------------|-----------|----------|----------|--------------------|--------------------|--------------------|
|           |           |            |           | SKAT     | SKAT-O   | QTest <sub>1</sub> | QTest <sub>2</sub> | QTest <sub>3</sub> |
| ALT       | KLF4      | 9          | 15        | 1.89E-04 | 1.37E-04 | 7.39E-05           | 6.24E-06           | 3.41E-05           |
| AST       | GPR22     | 16         | 2         | 9.97E-04 | 1.11E-04 | 4.52E-05           | 9.77E-04           | 2.10E-05           |
|           | PLAGL2    | 20         | 4         | 1.17E-03 | 5.23E-05 | 2.79E-05           | 5.68E-04           | 3.09E-05           |
|           | TRIM22    | 11         | 14        | 7.05E-03 | 2.93E-05 | 4.44E-02           | 7.14E-05           | 6.33E-05           |
| GGT       | CTPS      | 7          | 20        | 4.92E-01 | 6.70E-01 | 3.28E-02           | 3.02E-05           | 6.77E-05           |

Gene-Set Association Tests for Next-Generation Sequencing Data

**Table S3.** Significant genes within two identified gene-sets associated with liver enzymes

| Gene-set                                                  | Gene     | P-value          |                      |                      |                      |         |                     |      |                      |                      |                      |         |         |
|-----------------------------------------------------------|----------|------------------|----------------------|----------------------|----------------------|---------|---------------------|------|----------------------|----------------------|----------------------|---------|---------|
|                                                           |          | Discovery (KARE) |                      |                      |                      |         | Replication (CAVAS) |      |                      |                      |                      |         |         |
|                                                           |          | Size             | QTest <sub>1</sub>   | QTest <sub>2</sub>   | QTest <sub>3</sub>   | SKAT    | SKAT-O              | Size | QTest <sub>1</sub>   | QTest <sub>2</sub>   | QTest <sub>3</sub>   | SKAT    | SKAT-O  |
| KEGG_BETA_ALANINE_METABOLISM<br>(#genes=20 for discovery) | ALDH2    | 1                | 9.6E-08<br>(9.1E-08) | 9.6E-08<br>(9.1E-08) | 9.6E-08<br>(9.1E-08) | 1.1E-07 | 1.1E-07             | 3    | 8.8E-11<br>(0)       | 8.6E-01<br>(8.6E-01) | 3.3E-07<br>(3.1E-07) | 1.0E-01 | 7.2E-02 |
|                                                           | AOC2     | 7                | 3.3E-01<br>(3.3E-01) | 9.0E-02<br>(9.3E-02) | 1.3E-01<br>(1.3E-01) | 2.2E-02 | 3.8E-02             | 2    | 2.2E-01<br>(2.2E-01) | 2.8E-01<br>(2.8E-01) | 3.9E-01<br>(3.9E-01) | 3.3E-01 | 2.5E-01 |
|                                                           | ECHS1    | 2                | 5.7E-03<br>(5.3E-03) | 1.6E-02<br>(1.2E-02) | 1.3E-02<br>(1.3E-02) | 1.1E-02 | 4.5E-03             | -    | -                    | -                    | -                    | -       | -       |
|                                                           | DPYS     | 5                | 4.9E-02<br>(5.2E-02) | 1.2E-01<br>(1.2E-01) | 9.9E-02<br>(8.9E-02) | 9.3E-02 | 2.0E-02             | 3    | 1.3E-01<br>(1.4E-01) | 6.2E-02<br>(6.3E-02) | 1.3E-01<br>(1.7E-01) | 6.6E-02 | 1.1E-01 |
|                                                           | GAD1     | 6                | 1.1E-02<br>(1.0E-02) | 9.0E-02<br>(8.6E-02) | 2.3E-02<br>(1.8E-02) | 3.7E-02 | 2.0E-02             | 2    | 6.6E-02<br>(6.3E-02) | 8.2E-01<br>(8.6E-02) | 1.2E-01<br>(1.3E-01) | 1.3E-01 | 6.8E-02 |
|                                                           | GAD2     | 3                | 5.2E-02<br>(5.2E-02) | 4.6E-02<br>(4.2E-02) | 5.1E-02<br>(4.1E-02) | 2.7E-02 | 4.2E-02             | -    | -                    | -                    | -                    | -       | -       |
|                                                           | HADHA    | 3                | 1.5E-02<br>(1.6E-02) | 4.8E-02<br>(4.9E-02) | 3.2E-02<br>(2.7E-02) | 2.1E-02 | 2.0E-02             | -    | -                    | -                    | -                    | -       | -       |
|                                                           | MLYCD    | 3                | 9.9E-01<br>(9.9E-01) | 6.2E-01<br>(6.2E-01) | 7.1E-01<br>(7.1E-01) | 2.3E-01 | 2.8E-01             | 2    | 2.2E-02<br>(2.5E-02) | 7.1E-02<br>(7.0E-02) | 4.7E-02<br>(4.0E-02) | 3.9E-01 | 3.0E-01 |
| KEGG_LYSINE_DEGRADATION<br>(#genes=33 For discovery)      | AASDH    | 9                | 5.5E-01<br>(5.4E-01) | 4.7E-02<br>(4.8E-02) | 8.2E-02<br>(7.1E-02) | 5.7E-02 | 1.1E-01             | 4    | 6.1E-01<br>(6.2E-01) | 3.6E-02<br>(3.7E-02) | 3.9E-02<br>(3.1E-02) | 1.7E-02 | 2.9E-02 |
|                                                           | AASS     | 3                | 6.0E-01<br>(6.0E-01) | 3.2E-01<br>(3.2E-01) | 3.8E-01<br>(3.8E-01) | 3.8E-01 | 5.5E-01             | 2    | 9.9E-01<br>(9.9E-01) | 6.3E-01<br>(6.1E-01) | 3.8E-02<br>(3.0E-02) | 6.3E-02 | 9.5E-02 |
|                                                           | ALDH2    | 1                | 9.6E-08<br>(9.1E-08) | 9.6E-08<br>(9.1E-08) | 9.6E-08<br>(9.1E-08) | 1.1E-07 | 1.1E-07             | 3    | 8.8E-11<br>(0)       | 8.6E-01<br>(8.6E-01) | 3.3E-07<br>(3.1E-07) | 5.5E-02 | 2.9E-02 |
|                                                           | ECHS1    | 2                | 5.7E-03<br>(5.3E-03) | 1.6E-02<br>(1.2E-02) | 1.3E-02<br>(1.3E-02) | 1.1E-02 | 4.5E-03             | -    | -                    | -                    | -                    | -       | -       |
|                                                           | EHMT2    | 3                | 7.8E-03<br>(6.8E-03) | 6.5E-01<br>(6.5E-01) | 1.7E-02<br>(1.2E-02) | 7.1E-01 | 7.9E-01             | -    | -                    | -                    | -                    | -       | -       |
|                                                           | PLOD3    | 7                | 7.1E-01<br>(7.0E-01) | 2.0E-03<br>(2.4E-03) | 2.4E-03<br>(1.7E-03) | 6.4E-03 | 1.2E-02             | 4    | 8.4E-01<br>(8.4E-01) | 5.7E-01<br>(5.7E-01) | 6.5E-01<br>(6.4E-01) | 5.0E-01 | 5.5E-01 |
|                                                           | SUV420H2 | 1                | 3.4E-02<br>(3.3E-02) | 3.4E-02<br>(3.3E-02) | 3.4E-02<br>(3.3E-02) | 3.4E-02 | 3.4E-02             | -    | -                    | -                    | -                    | -       | -       |

A decimal in parenthesis refers to a permutation p-value

# Gene-Set Association Tests for Next-Generation Sequencing Data

**Fig. S1.** Power of gene-level tests for varying proportion of protective variants

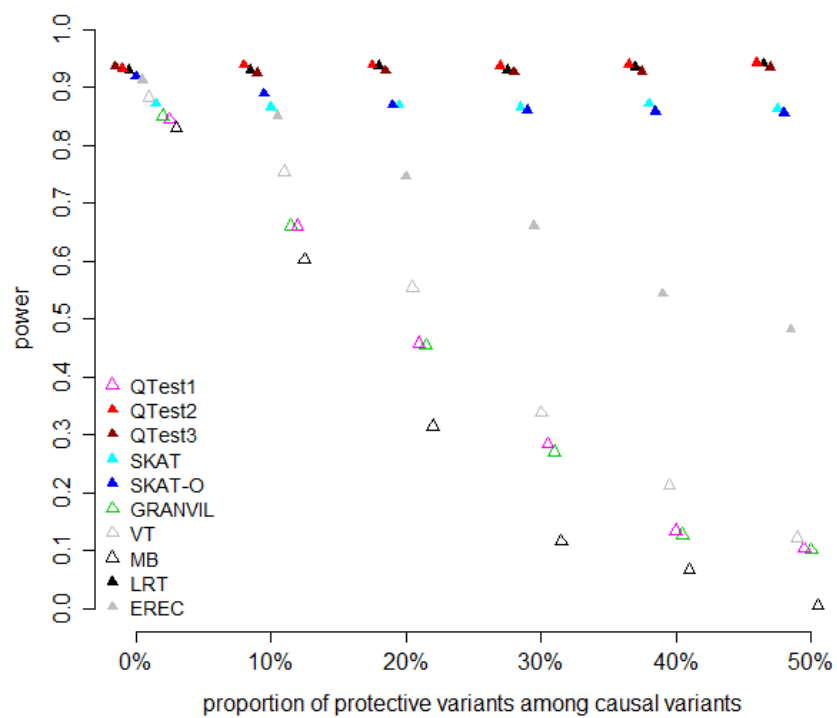

# Gene-Set Association Tests for Next-Generation Sequencing Data

**Fig. S2.** Power of gene-level tests for varying proportion of common variants

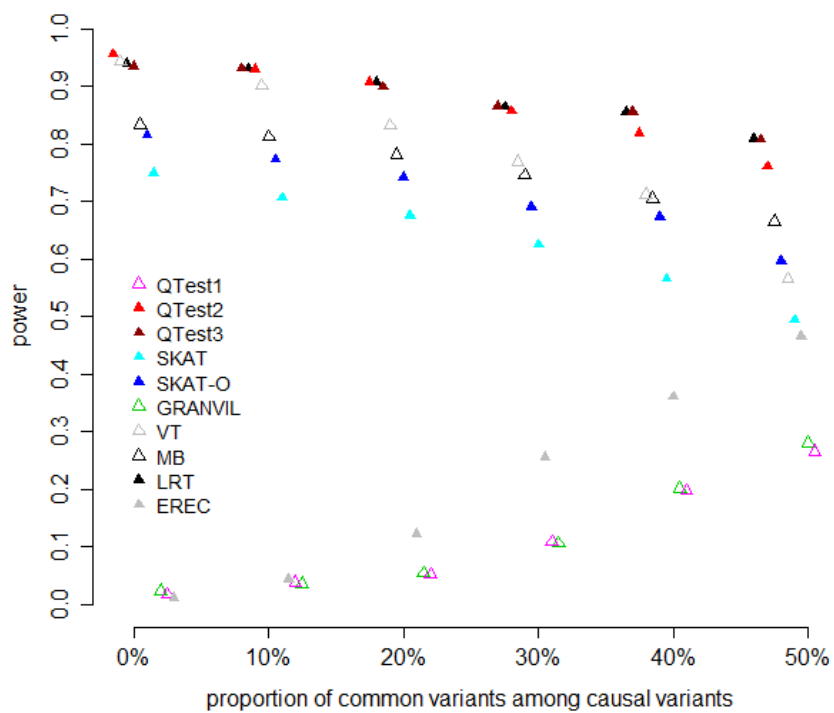

# Gene-Set Association Tests for Next-Generation Sequencing Data

**Fig. S3.** Power of gene-set-level tests for varying proportion of causal variants (for effect size 0.75).

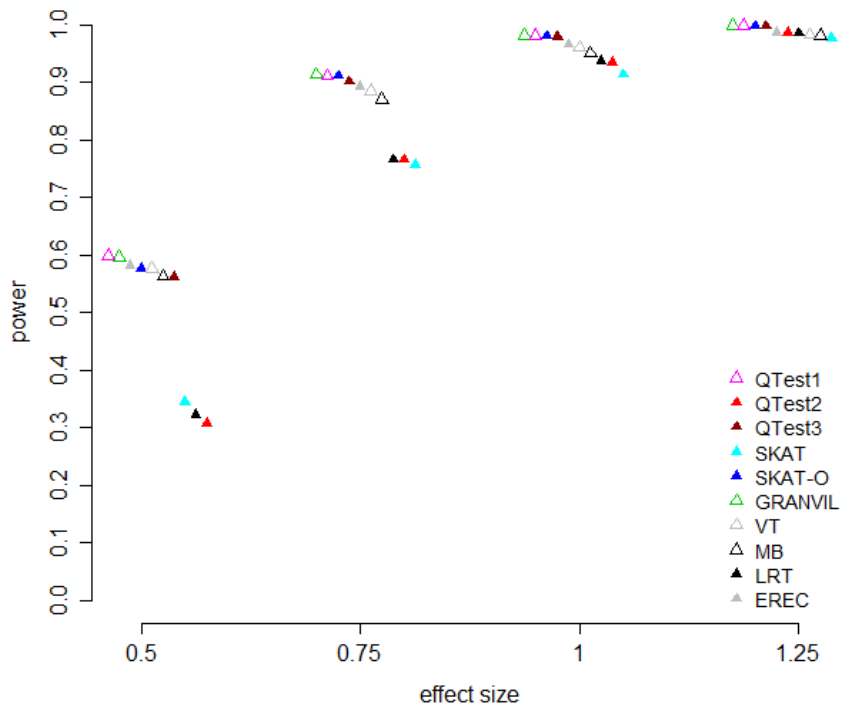

# Gene-Set Association Tests for Next-Generation Sequencing Data

**Fig. S4.** Distribution of  $t (= \beta/se(\beta))$  in some significant gene sets

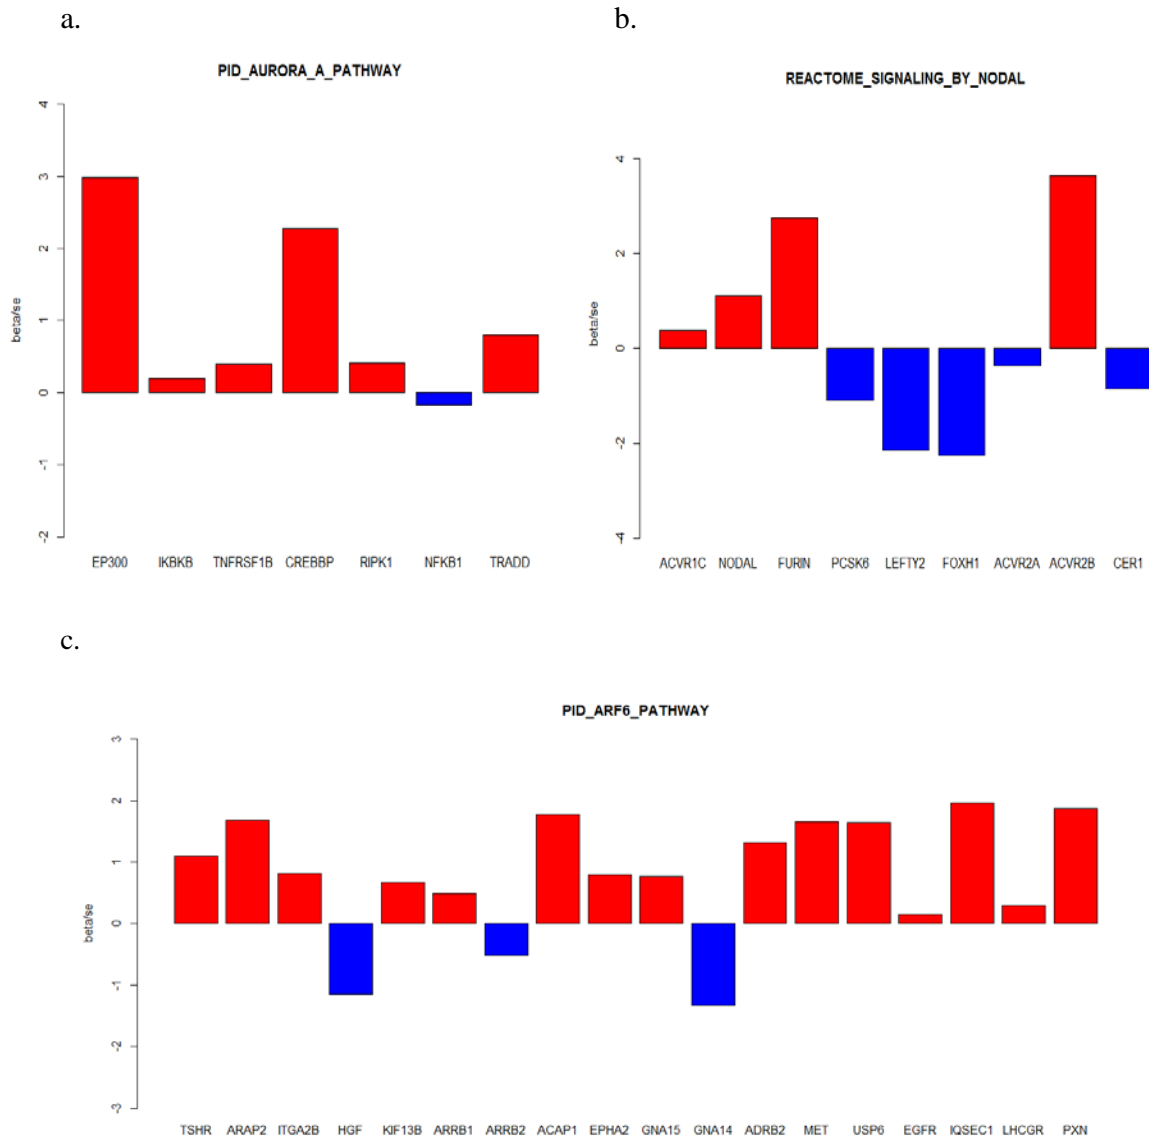

Supplement: supp_btw429_Supplementary_Files.pdf [file supp_btw429_Supplementary_Files.pdf]
